# Supplementary material for: Evaluation of VCAM-1 Targeted Naringenin/Indocyanine Green-Loaded Lipid Nanoemulsions as Theranostic Nanoplatforms in Inflammation
Source: MDPI journal article supplement (doi:10.3390/pharmaceutics12111066), 2020-11-09

# Size Distribution Report by Intensity

v2.2

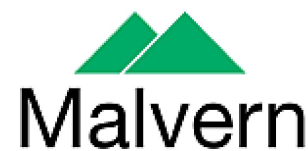

## Sample Details

**Sample Name:** Nar/ICG/LN (T0)

**SOP Name:** LN\_EF\_apa.sop

**General Notes:**

|                                   |                                                                |
|-----------------------------------|----------------------------------------------------------------|
| <b>File Name:</b> no42.dts        | <b>Dispersant Name:</b> Water                                  |
| <b>Record Number:</b> 236         | <b>Dispersant RI:</b> 1.330                                    |
| <b>Material RI:</b> 1.45          | <b>Viscosity (cP):</b> 0.8872                                  |
| <b>Material Absorbtion:</b> 0.001 | <b>Measurement Date and Time:</b> Wednesday, 17 July, 2019 ... |

## System

|                                                    |                                        |
|----------------------------------------------------|----------------------------------------|
| <b>Temperature (°C):</b> 25.0                      | <b>Duration Used (s):</b> 80           |
| <b>Count Rate (kcps):</b> 144.8                    | <b>Measurement Position (mm):</b> 4.65 |
| <b>Cell Description:</b> Disposable sizing cuvette | <b>Attenuator:</b> 7                   |

## Results

|                                | Size (d.n...         | % Intensity: | St Dev (d.n... |
|--------------------------------|----------------------|--------------|----------------|
| <b>Z-Average (d.nm):</b> 230.2 | <b>Peak 1:</b> 257.9 | 100.0        | 102.6          |
| <b>Pdl:</b> 0.185              | <b>Peak 2:</b> 0.000 | 0.0          | 0.000          |
| <b>Intercept:</b> 0.954        | <b>Peak 3:</b> 0.000 | 0.0          | 0.000          |

**Result quality** **Good**

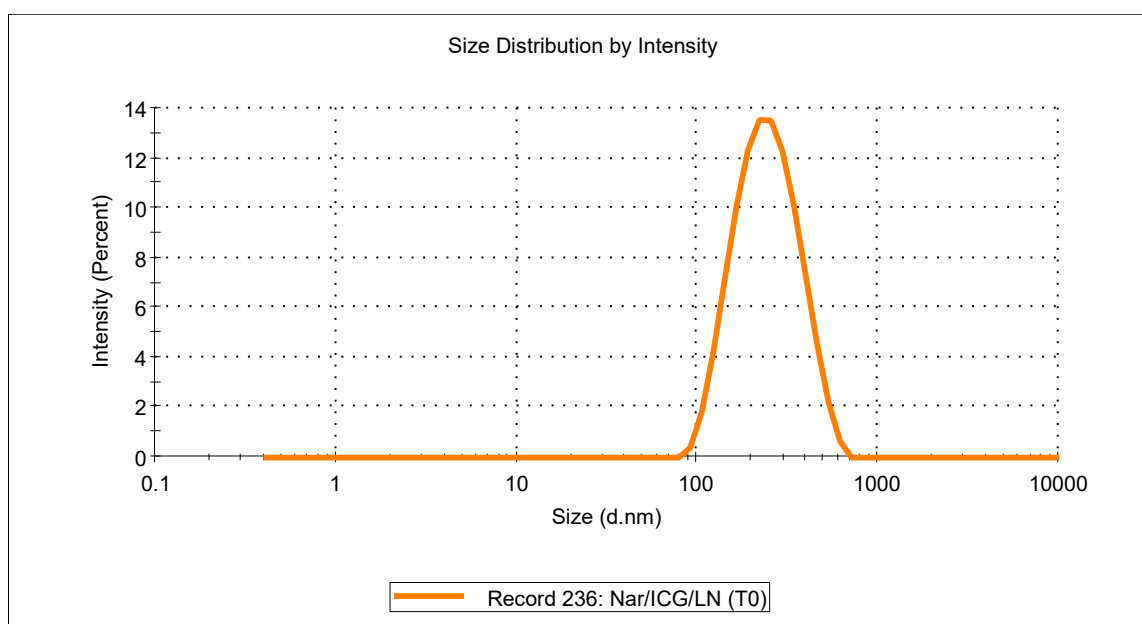

Supplement: s1 [file s1]
